# Supplementary material
Source: PubMed Central journal article supplement (PMC2691684)
Supplement: me.2009-0135_1.pdf [file me.2009-0135_1.pdf]

ERRATUM: In the article by McKenna *et al.*, “Minireview: Evolution of NURSA, the Nuclear Receptor Signaling Atlas” (Mol Endocrinol 23: 740-746, 2009), NIH grant U19DK62434 should have been listed in the acknowledgments. The authors regret the error.
